# Supplementary material
Source: PubMed Central journal article supplement (PMC3362687)
Supplement: NIHMS368391-supplement-01.pdf [file NIHMS368391-supplement-01.pdf]

1 **Supplementary Figure.** Antibody responses after vaccination with HA DNA. Antibody

2 isotype (A) IgG1 and (B) IgG2a.

3

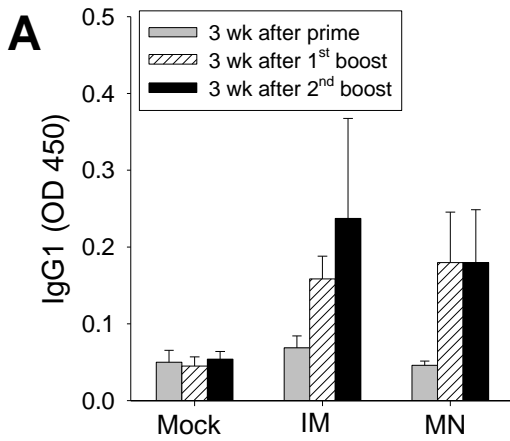

4

5

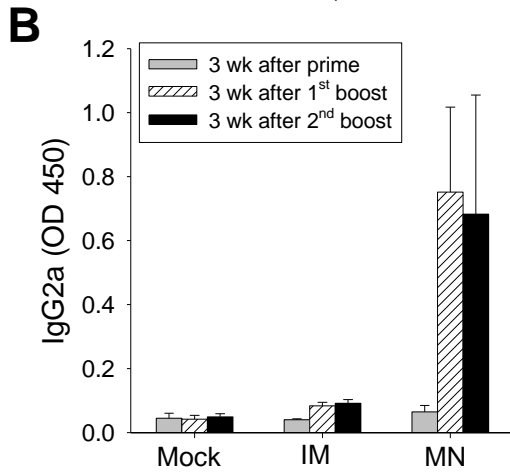

6
